# Supplementary material for: Microwave-Assisted Solution Synthesis of Metastable Intergrowth of AgInS2 Polymorphs
Source: MDPI journal article supplement (doi:10.3390/molecules27061815), 2022-03-10
Supplement: s1 [file s1]

## Microwave-assisted solution synthesis of metastable intergrowth of AgInS<sub>2</sub> polymorphs

Adedoyin N. Adeyemi <sup>1</sup>, Rae Ann Earnest <sup>1</sup>, Tori Cox <sup>1</sup>, Oleg I. Lebedev <sup>2</sup>, Julia V. Zaikina<sup>1</sup>

<sup>1</sup> Department of Chemistry, Iowa State University, Ames Iowa 50011, United states

<sup>2</sup> Laboratoire CRISMAT, ENSICAEN, CNRS UMR 6508, 14050 Caen, France.

# Supplementary Information

## Table of Contents

|                                                                                                                    |    |
|--------------------------------------------------------------------------------------------------------------------|----|
| Figure S1. PXRD pattern of 1-step and 2-step synthesized In <sub>2</sub> S <sub>3</sub> in both water and DES..... | S2 |
| Figure S2. DSC/TGA and PXRD data of water synthesized In <sub>2</sub> S <sub>3</sub> .....                         | S3 |
| Figure S3. PXRD data showing the metathesis reaction from In <sub>2</sub> S <sub>3</sub> to Ag <sub>2</sub> S..... | S4 |

A possible mechanism of AgInS<sub>2</sub> formation in the solution (DES or water) could be a partial cation exchange between a solid binary sulfide and the ions from the solution according to equations (1-2):

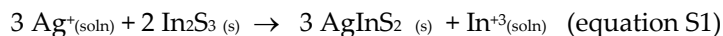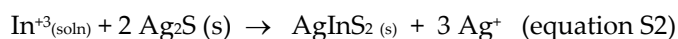

To further investigate this, we attempted the synthesis of AgInS<sub>2</sub> from binary In<sub>2</sub>S<sub>3</sub> or Ag<sub>2</sub>S. In<sub>2</sub>S<sub>3</sub> was synthesized by both *1-step and 2-step* synthesis in both water and DES as shown in Figure 6. The PXRD patterns of all the synthesized In<sub>2</sub>S<sub>3</sub> are similar and correspond to the tetragonal In<sub>2</sub>S<sub>3</sub> (ICSD 183879). The peaks are broad indicating low crystallinity and small particle size, although the water synthesized In<sub>2</sub>S<sub>3</sub> samples are more crystalline than the DES synthesized In<sub>2</sub>S<sub>3</sub> samples. There are two additional unknown peaks that appear in the PXRD data denoted by dots in Figure 6. One is a relatively intense peak at a low 2θ of ~6° and the other peak is at ~20°. We attribute the unknown peaks, especially the one at ~6° to a new

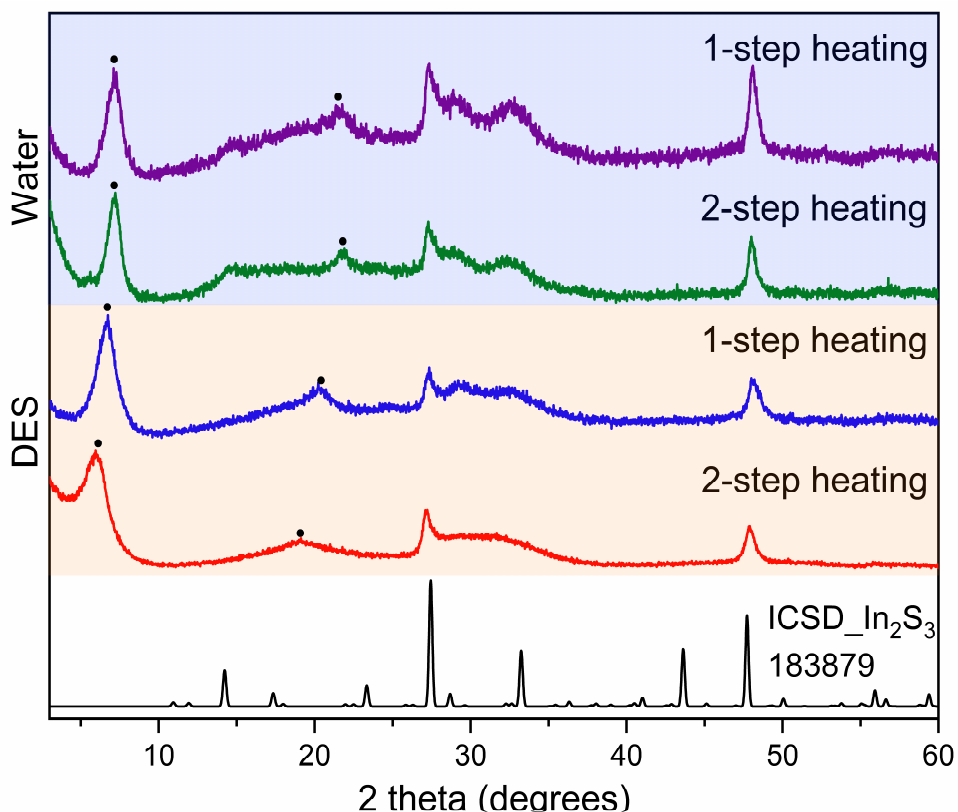

**Figure S1.** PXRD pattern of 1-step and 2-step synthesized In<sub>2</sub>S<sub>3</sub> in both water (blues-shadowed region) and DES (orange-shadowed region).

interlayer spacing possibly arising as a result of filling the interlayer space in  $\text{In}_2\text{S}_3$  structure with organic species, most likely originating from thiourea because it appears in both the water and DES made  $\text{In}_2\text{S}_3$  samples. We also observed that the unknown peaks are slightly shifted to lower diffraction angles in DES synthesized sample as compared to water synthesized  $\text{In}_2\text{S}_3$  samples.

To investigate our hypothesis of the intercalated organic species in the synthesized  $\text{In}_2\text{S}_3$ , we performed DSC/TGA experiment on a water synthesized  $\text{In}_2\text{S}_3$ . The sample was heated to 200°C and also at 500°C in the open alumina crucible in the flow of argon gas. An exothermic peak at 465°C is observed on cooling in DSC data, with the corresponding 17% mass loss at the same temperature, as seen in TG data (Figure 7a).

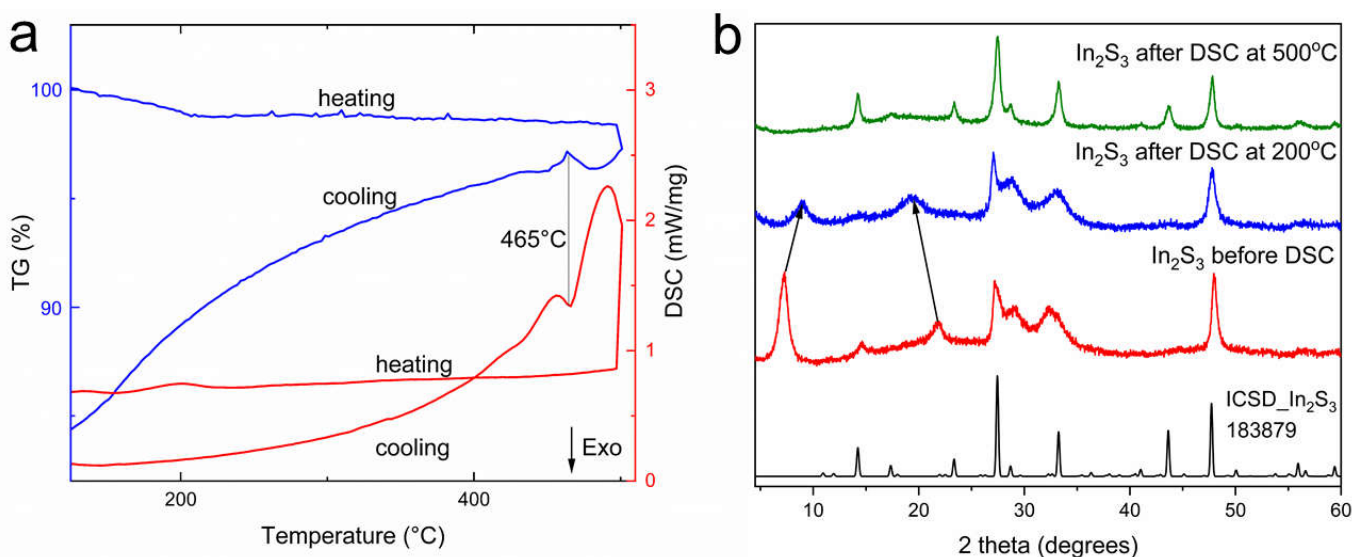

**Figure S2.** a) DSC/TGA data of water synthesized  $\text{In}_2\text{S}_3$  at 500°C b) PXRD pattern of water synthesized  $\text{In}_2\text{S}_3$  before and after DSC at 200°C and 500°C.

The PXRD data of the *1-step* water synthesized  $\text{In}_2\text{S}_3$  was collected after performing a DSC experiment. The PXRD pattern obtained after heating at 200°C shows a significant decrease in the intensity of the peak at  $\sim 6^\circ$   $2\theta$ . The peak also shifts to a higher diffraction angle of  $\sim 9^\circ$   $2\theta$  indicating a reduction in the interlayer spacing. A slight reduction in the intensity of the peak at  $\sim 20^\circ$   $2\theta$  is also observed, however the peak was slightly shifted to a lower diffraction angle of  $\sim 19^\circ$   $2\theta$ . The PXRD pattern of the sample obtained after heating at 500°C shows the complete elimination of the unknown peaks as well as a suggests formation of more crystalline  $\text{In}_2\text{S}_3$ .

We then attempted a synthesis of  $\text{AgInS}_2$  from pre-made water synthesized (as described above)  $\text{In}_2\text{S}_3$  by reacting it with aqueous solution of  $\text{AgNO}_3$  (Figure S3). Upon mixing of the precursors, we observed an instantaneous reaction at room temperature as indicated by a color change of the yellow  $\text{In}_2\text{S}_3$  to mostly black solid with few yellow unreacted particles. The PXRD pattern of the instantly formed unknown solid reveals  $\text{In}_2\text{S}_3$  with a decreased crystallinity (Figure 8a-b). The intensity of the peak at  $\sim 6^\circ$  is also significantly decreased indicating that the reaction affects the interlayer spacing as shown in Figure 8b. We then prepared an aqueous solution of  $\text{AgNO}_3$  with twice the stoichiometric amount of  $\text{Ag}^+$  needed for the reaction. This solution was reacted with  $\text{In}_2\text{S}_3$  and left for 2 days at room temperature. A metathesis reaction

occurs and  $\text{Ag}_2\text{S}$  is the resulting product as shown in Figure 8c. We also reacted an aqueous solution of  $\text{AgNO}_3$  with  $\text{In}_2\text{S}_3$  in stoichiometric ratio for a day and this resulted in a mixture of  $\text{In}_2\text{S}_3$  and  $\text{Ag}_2\text{S}$ .

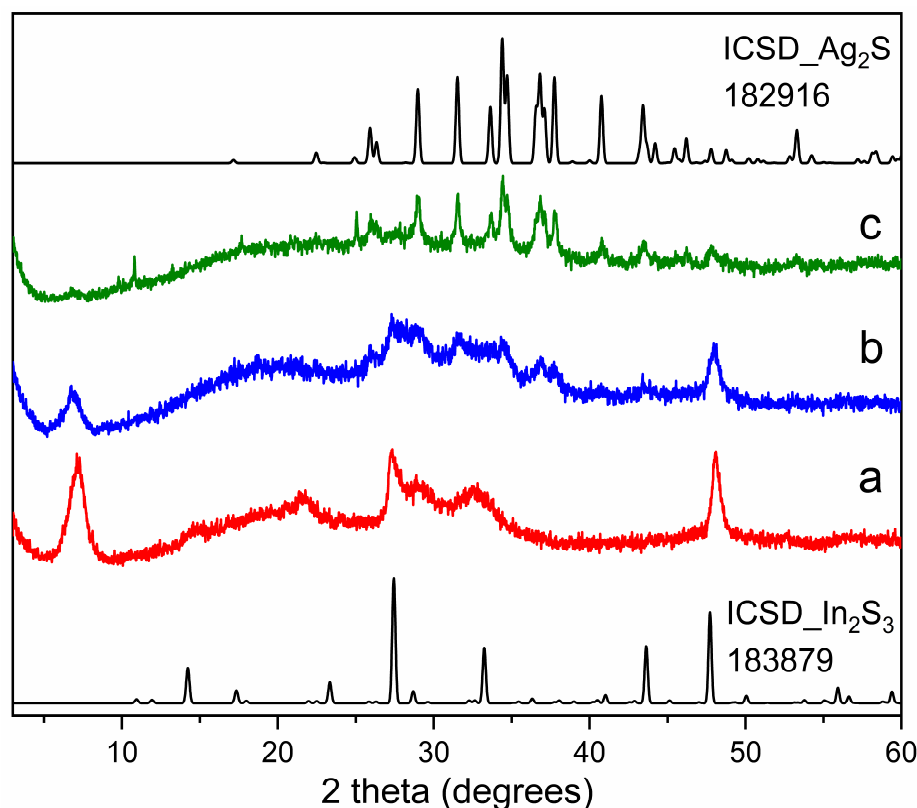

**Figure S3.** PXRD pattern of a) *1- step* water synthesized  $\text{In}_2\text{S}_3$  b) the instantaneously formed product of a reaction of pre-made  $\text{In}_2\text{S}_3$  with aqueous  $\text{AgNO}_3$  solution c) the  $\text{Ag}_2\text{S}$  product obtained from the metathesis reaction of  $\text{In}_2\text{S}_3$  with a twice concentrated aqueous  $\text{AgNO}_3$  solution at room temperature which was left undisturbed for 2 days.

To study the effect of microwave heating, an aqueous solution of  $\text{AgNO}_3$  was mixed with  $\text{In}_2\text{S}_3$  prepared by *1-step* water synthesis (described above) and then placed in the microwave for a *1-step* synthesis. This resulted in  $\text{In}(\text{OH})_3$  as the major phase,  $\text{Ag}_2\text{S}$  and a small amount of  $\text{AgCl}$  (data not shown). We also attempted reacting a pre-made crystalline  $\text{Ag}_2\text{S}$  with aqueous  $\text{InCl}_3 \cdot x\text{H}_2\text{O}$  in the microwave reactor for a *1-step* synthesis at 180 deg. C, but the reaction did not proceed at all and only an unreacted  $\text{Ag}_2\text{S}$  was observed by PXRD.

The inability to successfully synthesize  $\text{AgInS}_2$  from a premade  $\text{In}_2\text{S}_3$  intermediate suggests that the reaction pathway toward desired ternary phase does not include  $\text{In}_2\text{S}_3$  intermediate. We ruled out crystalline  $\text{Ag}_2\text{S}$  as a possible intermediate because of the lack of reaction with aqueous  $\text{InCl}_3 \cdot x\text{H}_2\text{O}$ . Furthermore, in the metathesis reaction of  $\text{In}_2\text{S}_3$  with a  $\text{AgNO}_3$  solution, the formation of  $\text{Ag}_2\text{S}$  signals the end of the reaction.
